# Supplementary material
Source: ML conference proceedings conference paper supplement (https://proceedings.mlr.press/v80/mhamdi18a.html)
Supplement: Supplementary file [file mhamdi18a-supp.pdf]

---

# The Hidden Vulnerability of Distributed Learning in Byzantium

## Supplementary Material

---

El Mahdi El Mhamdi<sup>1</sup> Rachid Guerraoui<sup>1</sup> Sébastien Rouault<sup>1</sup>

### A. Brute's $(\alpha, f)$ -Byzantine-resilience proof

#### A.1. Background

**Definition 1** ( $(\alpha, f)$ -Byzantine-resilience).

Let  $(\alpha, f) \in [0, \pi/2] \times [0..n]$  be any angle and any integer. Let  $n \in \mathbb{N}$  with  $n > f$ .

Let  $(V_1 \dots V_{n-f}) \in (\mathbb{R}^d)^{n-f}$  be independent, identically distributed random vectors, with  $V_i \sim \mathcal{G}$  and  $\mathbb{E}[\mathcal{G}] = G$ .

Let  $(B_1 \dots B_f) \in (\mathbb{R}^d)^f$  be random vectors, possibly dependent between them and the vectors  $(V_1 \dots V_{n-f})$ .

Then, an aggregation rule  $\mathcal{F}$  is said to be  $(\alpha, f)$ -Byzantine-resilient if, for any  $1 \leq j_1 < \dots < j_f \leq n$ , the vector:

$$F = \mathcal{F} \left( V_1, \dots, \underbrace{B_1}_{j_1}, \dots, \underbrace{B_f}_{j_f}, \dots, V_n \right)$$

satisfies:

1.  $\langle \mathbb{E}[F], G \rangle \geq (1 - \sin \alpha) \cdot \|G\|^2 > 0$
2.  $\forall r \in \{2, 3, 4\}$ ,  $\mathbb{E} \|F\|^r$  is bounded above by a linear combination of the terms  $\mathbb{E} \|G\|^{r_1} \cdot \dots \cdot \mathbb{E} \|G\|^{r_{n-1}}$ , with  $r_1 + \dots + r_{n-1} = r$ .

#### A.2. Definition

Let  $(n, f) \in \mathbb{N}^2$  with  $n \geq 2f + 1$ .

Let  $(V_1 \dots V_{n-f}) \in (\mathbb{R}^d)^{n-f}$  be independent, identically distributed random vectors, with  $V_i \sim \mathcal{G}$  and  $\mathbb{E}[\mathcal{G}] = G$ .

Let  $(B_1 \dots B_f) \in (\mathbb{R}^d)^f$  be random vectors, possibly dependent between them and the vectors  $(V_1 \dots V_{n-f})$ .

Let  $\|\cdot\|_p$  be the  $\ell_p$ -norm, with  $p \in \mathbb{N}^* \cup \{+\infty\}$ .

Let  $\mathcal{Q} = \{V_1 \dots V_n\}$  be the set of submitted gradients.

Let  $\mathcal{R} = \{\mathcal{X} \mid \mathcal{X} \subset \mathcal{Q}, |\mathcal{X}| = n - f\}$  be the set of all the subsets of  $\mathcal{Q}$  with a cardinality of  $n - f$ .

Let  $\mathcal{S} = \arg \min_{\mathcal{X} \in \mathcal{R}} \left( \max_{(V_i, V_j) \in \mathcal{X}^2} (\|V_i - V_j\|_p) \right)$ .

Then, the aggregated gradient  $F = \frac{1}{n-f} \sum_{V \in \mathcal{S}} V$ .

#### A.3. Proof

Let  $\forall (i, j) \in [1..n-f]^2, i \neq j$  be  $\bar{\sigma} \triangleq \mathbb{E} \|V_i - V_j\|_p$ . Under the assumption that  $2f\bar{\sigma} < (n-f)\|G\|_p$ , we will prove that this rule is  $(\alpha, f)$ -Byzantine-resilient.

Trivial case:  $\forall i \in [1..f], B_i \notin \mathcal{S}$ .

As the aggregated gradient  $F$  is the arithmetic mean of unbiased vectors  $V_j$ , we have  $\mathbb{E}[F] = G$ , and points 1. and 2. of definition 1 are trivially satisfied.

Otherwise, without loss of generality, let  $b \in [1..f]$  and  $\mathcal{S} = \{V_1 \dots V_{n-f-b}, B_1 \dots B_b\}$ ,  $\bar{\mathcal{R}} = \mathcal{R} \setminus \mathcal{S}$ . It holds:

$$\begin{aligned} \forall \bar{\mathcal{S}} \in \bar{\mathcal{R}}, \exists X_i \in \bar{\mathcal{S}} \setminus \mathcal{S}, \exists X_j \in \bar{\mathcal{S}} \setminus \{X_i\}, \\ \forall X_k \in \mathcal{S}, \forall X_l \in \mathcal{S} \setminus \{X_k\}, \\ \|X_k - X_l\|_p < \|X_i - X_j\|_p \end{aligned}$$

We can also notice that:  $\exists \mathcal{V} \in \bar{\mathcal{R}}, \forall i \in [1..f], B_i \notin \mathcal{V}$ . Then, by combining this observation with the previous one:

$$\begin{aligned} \forall a \in [1..b], B_a \in \mathcal{S} \\ \Rightarrow \exists (x_a, y_a) \in [1..n-f]^2, x_a \neq y_a, \\ \forall k \in [1..n-f-b], \\ \|B_a - V_k\|_p < \|V_{x_a} - V_{y_a}\|_p \end{aligned}$$

This last observation will be reused in the following.

We can compute the aggregated gradient:

$$F = \frac{1}{n-f} \left( \sum_{i=1}^{n-f-b} V_i + \sum_{i=1}^b B_i \right)$$

and compare it with the average of the non-Byzantine ones:

$$\begin{aligned} \widehat{G} &= \frac{1}{n-f} \sum_{i=1}^{n-f} V_i \\ F - \widehat{G} &= \frac{1}{n-f} \left( \sum_{i=1}^b B_i - \sum_{i=n-f-b+1}^{n-f} V_i \right) \\ &= \frac{1}{n-f} \sum_{i=1}^b B_i - V_{i+n-f-b} \end{aligned}$$

$$\begin{aligned}
 \|F - \widehat{G}\|_p &\leq \frac{1}{n-f} \sum_{i=1}^b \|B_i - V_{i+n-f-b}\|_p \\
 &\leq \frac{1}{n-f} \sum_{i=1}^b \left( \|B_i - V_1\|_p \right. \\
 &\quad \left. + \|V_1 - V_{i+n-f-b}\|_p \right) \\
 &\leq \frac{1}{n-f} \sum_{i=1}^b \left( \|V_{x_i} - V_{y_i}\|_p \right. \\
 &\quad \left. + \|V_1 - V_{i+n-f-b}\|_p \right)
 \end{aligned}$$

We can then compute the expected value of this distance, and with  $\mathbb{E}[\widehat{G}] \triangleq G$  and the Jensen's inequality:

$$\begin{aligned}
 \|\mathbb{E}[F] - G\|_p &\leq \mathbb{E} \|F - \widehat{G}\|_p \\
 &\leq \frac{1}{n-f} \sum_{i=1}^b \bar{\sigma} + \bar{\sigma} \\
 &\leq \frac{2b\bar{\sigma}}{n-f} \leq \frac{2f\bar{\sigma}}{n-f}
 \end{aligned}$$

So, under the assumption that  $2f\bar{\sigma} < (n-f)\|G\|_p$ , we verify that  $\|\mathbb{E}[F] - G\|_p < \|G\|_p$ , and so:  $\langle \mathbb{E}[F], G \rangle > 0$ .

Point 2. can also be verified formally,  $\forall r \in \{2, 3, 4\}$ :

$$\mathbb{E} \|F\|_p^r \leq \frac{n-f-b}{n-f} \mathbb{E} \|\mathcal{G}\|_p^r + \frac{1}{n-f} \sum_{i=1}^b \mathbb{E} \|B_i\|_p^r$$

Then, by using the binomial theorem twice:

$$\begin{aligned}
 \|B_i\|_p^r &\leq \sum_{r_1+r_2=r} \binom{r}{r_1} \|B_i - V_k\|_p^{r_1} \|V_k\|_p^{r_2} \\
 &\quad \text{with } k \in [1..n-f-d] \\
 \|B_i - V_k\|_p^{r_1} &\leq \|V_x - V_y\|_p^{r_1} \\
 &\leq \sum_{r_3+r_4=r_1} \binom{r_1}{r_3} \|V_x\|_p^{r_3} \|V_y\|_p^{r_4}
 \end{aligned}$$

Finally, as  $(V_1 \dots V_{n-f})$  are *independent, identically distributed* random variables following the same distribution  $\mathcal{G}$ , we have that  $\forall (i, j) \in [1..n-f]^2, i \neq j$ ,  $\mathbb{E}[\|V_i\|_p^{r_1} \|V_j\|_p^{r_2}] = \mathbb{E} \|\mathcal{G}\|_p^{r_1} \cdot \mathbb{E} \|\mathcal{G}\|_p^{r_2}$ , and so  $\mathbb{E} \|B_i\|_p^r$  is bounded as described in point 2. of definition 1.

## B. Approximation of $\alpha_m$ , with $p \in \mathbb{N}^*$

### B.1. Prior conventions and assumptions

Let remind:  $\forall i \in [1..n-f], V_i = (v_1^{(i)} \dots v_d^{(i)}) \sim \mathcal{G}$ .  
We model each coordinate as a *normal distribution*:

$$\begin{aligned}
 \forall j \in [1..d], \exists (\mu_j, \sigma_j) &\in \mathbb{R}^2, \\
 \forall i \in [1..n-f], v_j^{(i)} &\sim \mathcal{N}(\mu_j, \sigma_j^2)
 \end{aligned}$$

We assume  $d \gg 1$ , and we will write  $\bar{\delta}$  for:

$$\begin{aligned}
 \forall (i, j) \in [1..n-f]^2, i \neq j, \bar{\delta} &= \frac{1}{d} \sum_{k=1}^d \mathbb{E} |v_k^{(i)} - v_k^{(j)}| \\
 &= \frac{2}{d\sqrt{\pi}} \sum_{k=1}^d \sigma_k \\
 \text{and note that: } \frac{1}{d} \sum_{k=1}^d \mathbb{E} |v_k^{(i)} - \mu_k| &= \frac{\sqrt{2}}{d\sqrt{\pi}} \sum_{k=1}^d \sigma_k \\
 &= \frac{\bar{\delta}}{\sqrt{2}}
 \end{aligned}$$

Then,  $\forall (i, j) \in [1..n-f]^2, i \neq j$ , we can approximate:

$$\begin{aligned}
 \|V_i - V_j\|_p &= \left( \sum_{k=1}^d |v_k^{(i)} - v_k^{(j)}|^p \right)^{\frac{1}{p}} \\
 &\approx (d\bar{\delta}^p)^{\frac{1}{p}}
 \end{aligned}$$

Let  $E = (0 \dots 0, 1, 0 \dots 0) \in \mathbb{R}^d$  the attacked coordinate.  
Then, with  $\alpha_m > 0, B = \bar{V} + \alpha_m E$ , we can approximate:

$$\begin{aligned}
 \|B - V_i\|_p &= \left( \left( \sum_{k=1}^d |v_k^{(i)} - \bar{v}_k|^p \right) \right. \\
 &\quad \left. - |v_e^{(i)} - \bar{v}_e|^p + |v_e^{(i)} - \bar{v}_e + \alpha_m|^p \right)^{\frac{1}{p}} \\
 &\approx \left( \alpha_m^p + \sum_{k=1}^d |v_k^{(i)} - \mu_k|^p \right)^{\frac{1}{p}} \\
 &\approx \left( \alpha_m^p + d \left( \frac{\bar{\delta}}{\sqrt{2}} \right)^p \right)^{\frac{1}{p}}
 \end{aligned}$$

### B.2. Attack against Brute

We only study the *worst case* scenario, where  $n = 2f + 1$ , maximizing the proportion of Byzantine workers.

Assuming  $B$  is selected by Brute:

$$\begin{aligned}
 B &\in \mathcal{S} \\
 \Rightarrow \exists (x, y) &\in [1..n-f]^2, x \neq y,
 \end{aligned}$$

$$\begin{aligned}
 & \forall k \in [1..n-f-b], \|B - V_k\|_p < \|V_x - V_y\|_p \\
 & \rightsquigarrow \left( \alpha_m^p + d \left( \frac{\bar{\delta}}{\sqrt{2}} \right)^p \right)^{\frac{1}{p}} < (d\bar{\delta}^p)^{\frac{1}{p}} \\
 & \rightsquigarrow \alpha_m < \left( \left( 1 - \frac{1}{\sqrt{2^p}} \right) d \right)^{\frac{1}{p}} \bar{\delta}
 \end{aligned}$$

This is a *necessary*, approximated condition. It is only to give broad insights on the relation between some hyper-parameters and  $\alpha_m$ : with  $p, q$  constants,  $\alpha_m = \mathcal{O}(\bar{\delta} \sqrt[p]{d})$ .

### B.3. Attack against Krum/GeoMed

We only study the *worst case* scenario, where  $n = 2f + 3$ , maximizing the proportion of Byzantine workers. Let  $q \in \{1, 2\}$ ,  $q = 1$  for GeoMed and  $q = 2$  for Krum.

First, we approximate the Byzantine submission's score:

$$\begin{aligned}
 s(B) & \approx 2 \|B - V_i\|_p^q \\
 & \approx 2 \left( \alpha_m^p + d \left( \frac{\bar{\delta}}{\sqrt{2}} \right)^p \right)^{\frac{q}{p}}
 \end{aligned}$$

$\forall i \in [1..n-f]$ , let  $b \in [0..f]$  be how many  $B$  belongs to the  $n-f-2$  closest vectors to  $V_i$ . Then the score of  $V_i$  is:

$$\begin{aligned}
 s(V_i) & \approx b \|B - V_i\|_p^q + (f+1-b) \|V_j - V_i\|_p^q \\
 & \approx b \left( \alpha_m^p + d \left( \frac{\bar{\delta}}{\sqrt{2}} \right)^p \right)^{\frac{q}{p}} + (f+1-b) (d\bar{\delta}^p)^{\frac{q}{p}}
 \end{aligned}$$

Finally,  $B$  is selected  $\Rightarrow \forall i \in [1..n-f]$ ,  $s(B) \lesssim s(V_i)$

$$\Rightarrow \underset{\uparrow}{(2-b)} \left( \alpha_m^p + d \left( \frac{\bar{\delta}}{\sqrt{2}} \right)^p \right)^{\frac{q}{p}} \lesssim (f+1-b) (d\bar{\delta}^p)^{\frac{q}{p}}$$

$$\Rightarrow \underset{\uparrow}{\exists i} \alpha_m \lesssim \left( \left( \frac{f+1-b}{2-b} \right)^{\frac{2}{q}} - \frac{1}{\sqrt{2^p}} \right)^{\frac{1}{p}} d^{\frac{1}{p}} \bar{\delta}$$

This last implication is always true: there *must* be at least one non-Byzantine vector  $V_j$  for which  $b \in \{0, 1\}$ ; else  $\alpha_m$  could increase unbounded, which would be absurd.

In conclusion, with  $p, q$  constants:  $\alpha_m = \mathcal{O}(\bar{\delta} \sqrt[q]{f} \sqrt[p]{d})$ .

## C. Supplementary experiments

### C.1. Attack on Brute, Krum and GeoMed

On MNIST, here we use  $\eta_0 = 1$ ,  $r_\eta = 10000$ , a batch size of 83 images (256 for Brute), and for the workers:

|             |                                   |
|-------------|-----------------------------------|
| Krum/GeoMed | 30 non-Byzantines + 27 Byzantines |
| Brute       | 6 non-Byzantines + 5 Byzantines   |
| Average     | 30 non-Byzantines + 0 Byzantines  |

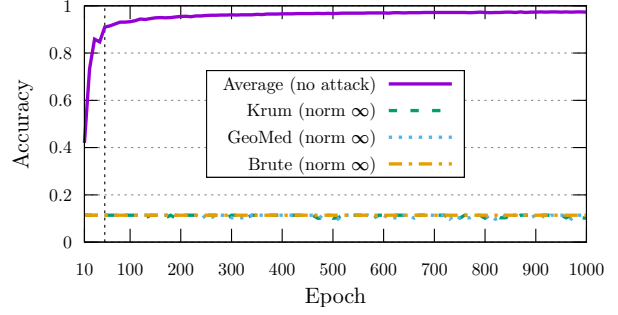

Figure 1. MNIST: accuracy on the testing set up to epoch 1000, comparing the presented aggregation rules under our attack. The attack was maintained only up to epoch 50 (dotted line). The *average* is the reference: it is the accuracy the model would have shown if only non-Byzantine gradients had been selected.

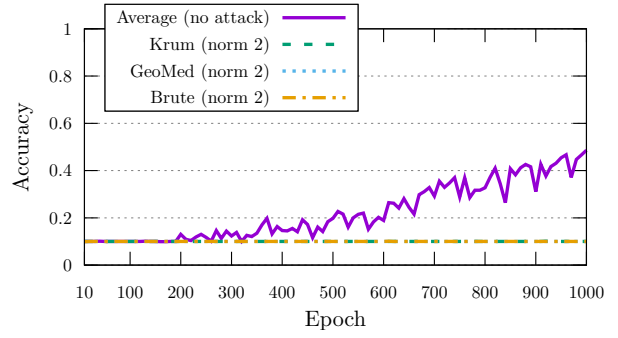

Figure 2. CIFAR-10: accuracy on the testing set up to epoch 1000, comparing the presented aggregation rules under our attack. The *average* is the reference: it is the accuracy the model would have shown if only non-Byzantine gradients had been selected.

On CIFAR-10, we use  $\eta_0 = 0.5$ ,  $r_\eta = 2000$ , a batch size of 128 images (256 for Brute), and for the worker counts:

|             |                                   |
|-------------|-----------------------------------|
| Krum/GeoMed | 21 non-Byzantines + 18 Byzantines |
| Brute       | 6 non-Byzantines + 5 Byzantines   |
| Average     | 21 non-Byzantines + 0 Byzantines  |

In Figure 1, the attack is maintained only up to 50 epochs. The attack variant for  $\ell_\infty$  norm-based gradient aggregation rules exhibited a very strong impact. None of the presented gradient aggregation rules prevented the stochastic gradient descent from being *pushed* and remaining in a sub-space of *ineffective* models, and for at least 1000 epochs.

In Figure 2, the attack is never stopped. Again, none of the presented gradient aggregation rules prevented the stochastic gradient descent from being *pushed* and remaining in a sub-space of *ineffective* models, for at least 1000 epochs.
